# Supplementary material
Source: PubMed Central journal article supplement (PMC5710001)
Supplement: NIHMS917902-supplement-1.pdf [file NIHMS917902-supplement-1.pdf]

## **SUPPLEMENTARY INFORMATION**

**Frampton et al.**

**Development and validation of a clinical cancer genomic profiling test based on massively parallel DNA sequencing**

## Supplementary Figure 1A

### Base substitution detection sensitivity as a function of coverage and mutant allele frequency

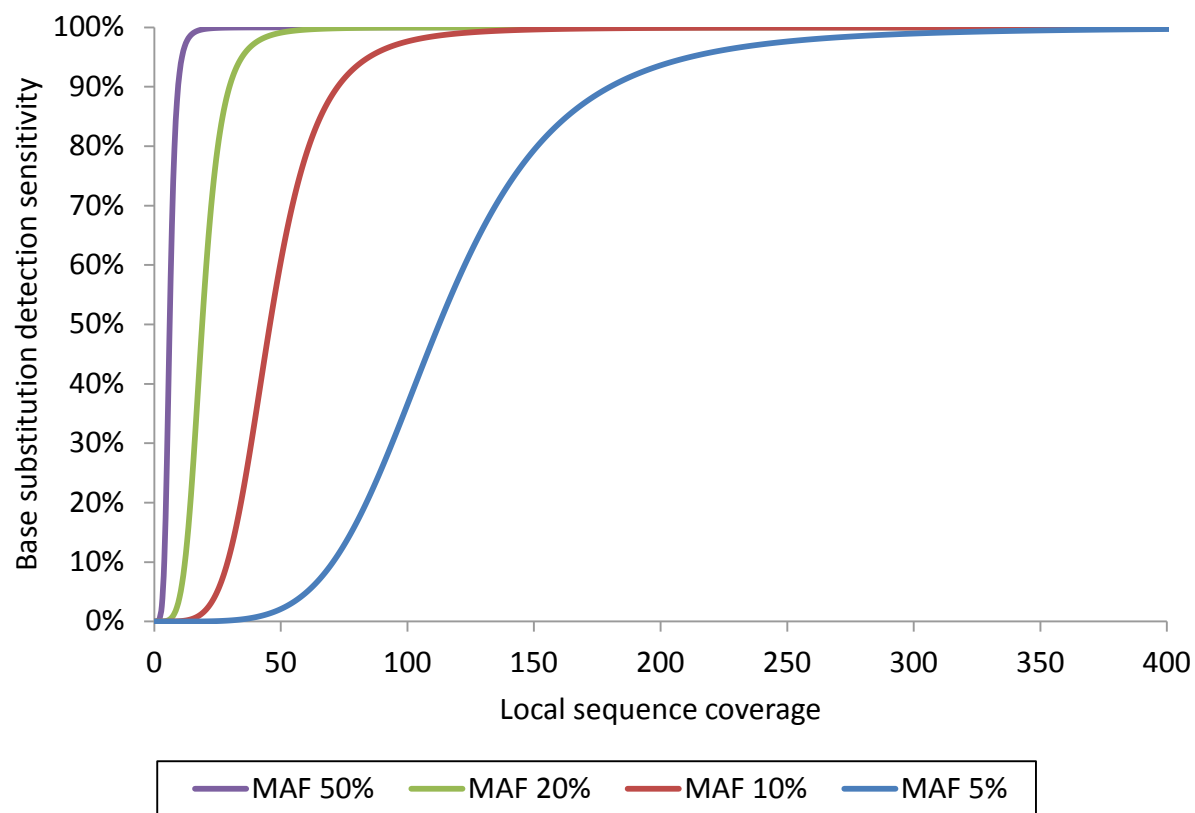

#### Supplementary Figure 1A caption:

A smoothed representation base substitution detection sensitivity as a function of local sequence coverage was generated based on test set calls in all down-sample datasets. Expected detection sensitivity was plotted at mutant allele frequencies 50%, 20%, 10%, and 5%.

## Supplementary Figure 1B

### Indel detection sensitivity as a function of coverage and mutant allele frequency

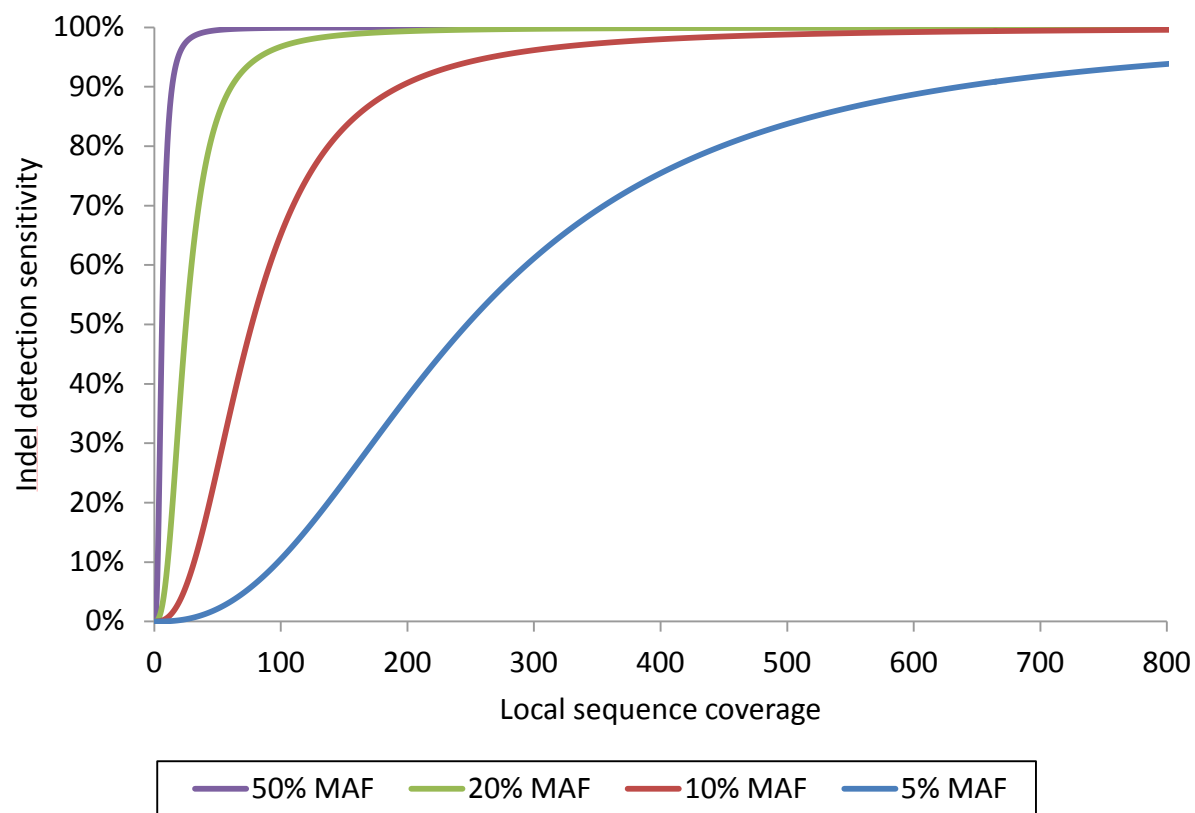

#### Supplementary Figure 1B caption:

A smoothed representation indel detection sensitivity as a function of local sequence coverage was generated based on test set calls in all down-sample datasets. Expected detection sensitivity was plotted at mutant allele frequencies 50%, 20%, 10%, and 5%.

## Supplementary Figure 2A

### Base substitution detection sensitivity for the Samtools algorithm compared to the FM pipeline

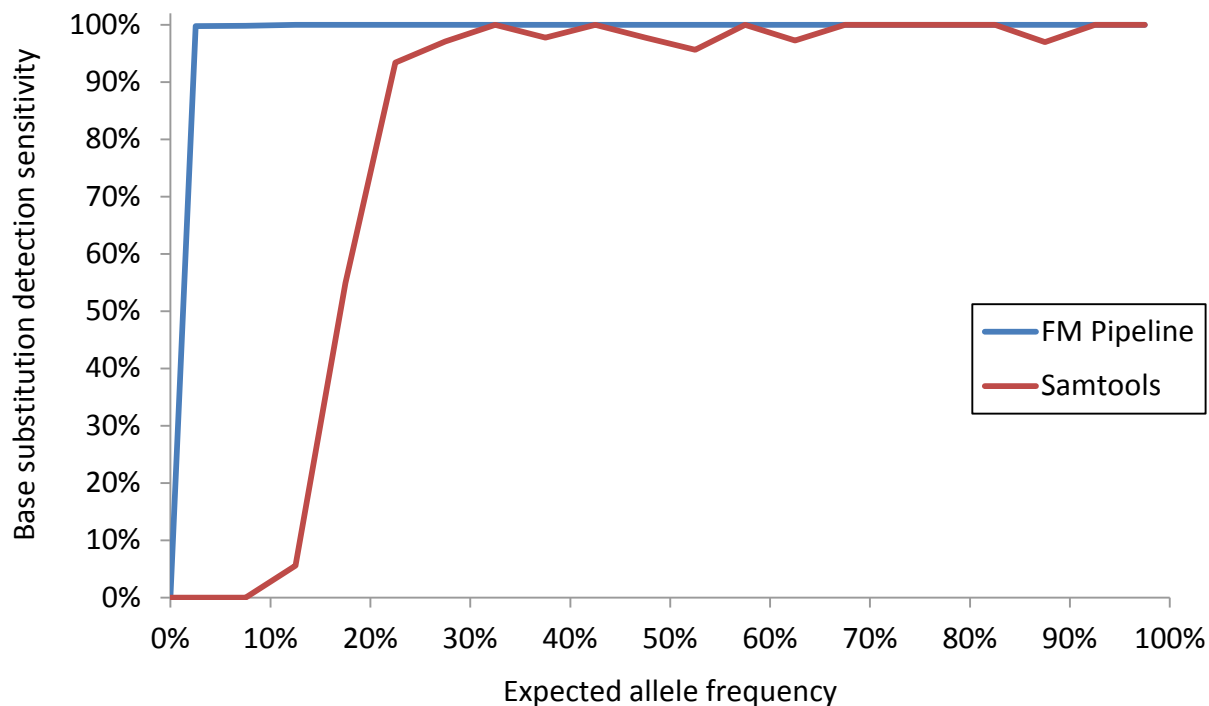

#### Supplementary Figure 2A caption:

Detection sensitivity for base substitutions was examined for the two normal cell-line pools (pool XX and pool YY) using the FM pipeline and Samtools 0.1.16. For Samtools, the variant calling procedure described at the Samtools homepage (<http://samtools.sourceforge.net/mpileup.shtml>) was used, with the commands:

- `samtools mpileup -uBD -Q 30 -q 20 -l <exon regions> -f hg19.fa <sampleX.bam> | bcftools view -bv -> <outputFile.bcf>`
- `bcftools view <outputFile.bcf> | vcutils.pl varFilter > outputFile.flt.vcf`

## Supplementary Figure 2B

### Indel detection sensitivity for the Dindel algorithm compared to the FM pipeline

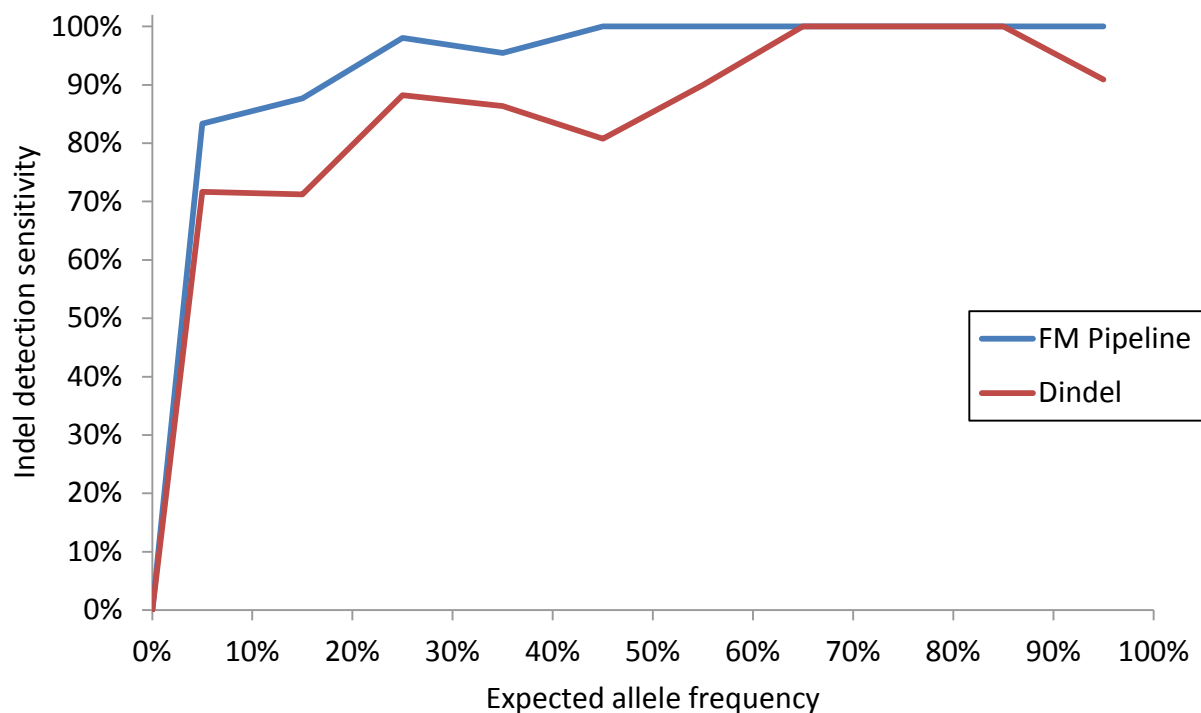

#### Supplementary Figure 2B caption:

Detection sensitivity for indel calls were generated for pure tumor cell lines and pools using the FM pipeline and Dindel 1.01. For Dindel, the four-step procedure for calling indels in pooled samples outlined in the Dindel 1.01 manual (<ftp://ftp.sanger.ac.uk/pub4/resources/software/dindel/manual-1.01.pdf>) was used with default settings. The “outside coverage range” variant filter was not applied.

### Supplementary Figure 3

#### Comparison of variant calls in paired blood and FFPE normal samples

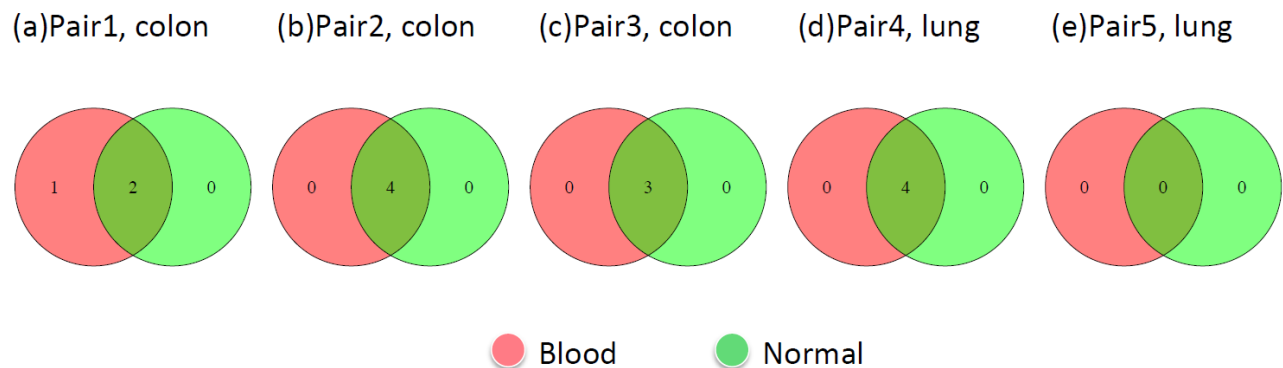

#### Supplementary Figure 3 caption:

Five pairs of blood and FFPE normal samples were used to compare pipeline variant calls. Total number of calls (post-filtering) is shown with overlap: calls in blood in red; calls in normal FFPE in green. FFPE tissue from pairs 1, 2, and 3 are colon; pairs 4 and 5 are lung.

**Supplementary Figure 4**  
**Impact of pre-analytic parameters on assay performance**

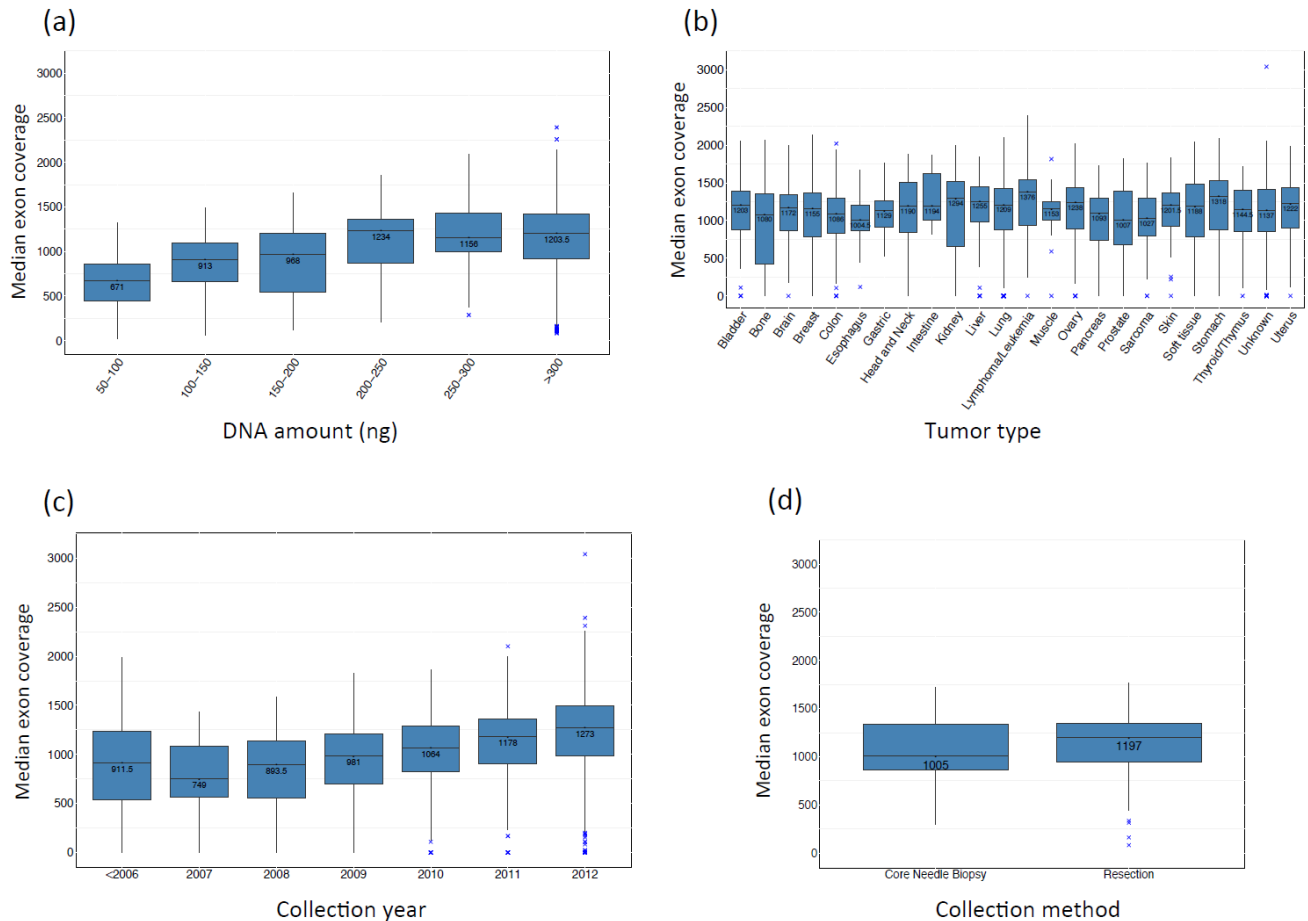

**Supplementary Figure 4 caption:**

Assay performance, as represented by median unique exon sequencing coverage, is shown for sub-groups of clinical patient samples. The upper and lower box edges denote the first and third quartiles, medians are represented by solid black lines in the boxes, and median numbers were showed below the lines. Whiskers extend to the largest and smallest data within 1.5 times of the interquartile ranges. Outliers, if any, are marked individually as blue crosses out of box.

- (a) Median exon coverage stratified by assay DNA input amount (ng).
- (b) Median exon coverage stratified by tumor type.
- (c) Median exon coverage stratified by sample collection year.
- (d) Median exon coverage stratified by two primary sample collection methods, where annotated.

**Supplementary Table 1A**  
**Genes targeted in hybridization capture (current test)**

|         |          |                  |        |        |         |         |         |          |
|---------|----------|------------------|--------|--------|---------|---------|---------|----------|
| ABL1    | BRIP1    | CHEK2            | FANCA  | GNAQ   | MAP2K1  | NFKBIA  | PPP2R1A | SMARCD1  |
| AKT1    | BTG1     | CHUK             | FANCC  | GNAS   | MAP2K2  | NKX2-1  | PRDM1   | SMO      |
| AKT2    | BTK      | CIC              | FANCD2 | GPR124 | MAP2K4  | NOTCH1  | PRKAR1A | SOCS1    |
| AKT3    | C17orf39 | CRBN             | FANCE  | GSK3B  | MAP3K1  | NOTCH2  | PRKDC   | SOX10    |
| ALK     | CARD11   | CREBBP           | FANCF  | HGF    | MAP3K13 | NOTCH3  | PRSS8   | SOX2     |
| ALOX12B | CASP8    | CRKL             | FANCG  | HLA-A  | MCL1    | NOTCH4  | PTCH1   | SPEN     |
| APC     | CBFB     | CRLF2            | FANCI  | HRAS   | MDM2    | NPM1    | PTEN    | SRC      |
| APCDD1  | CBL      | CSF1R            | FANCL  | IDH1   | MDM4    | NRAS    | PTPN11  | STAG2    |
| AR      | CCND1    | CTCF             | FANCM  | IDH2   | MED12   | NSD1    | RAD50   | STAT4    |
| ARAF    | CCND2    | CTNNB1           | FAT3   | IGF1   | MEF2B   | NTRK1   | RAD51   | STK11    |
| ARFRP1  | CCND3    | CUL4A            | FBXW7  | IGF1R  | MEN1    | NTRK2   | RAD51B  | SUFU     |
| ARID1A  | CCNE1    | CUL4B            | FGF10  | IGF2   | MET     | NTRK3   | RAD51C  | SYK      |
| ARID2   | CD79A    | CYP17A1          | FGF12  | IKBKE  | MITF    | NUP93   | RAD51D  | TBX3     |
| ASXL1   | CD79B    | DAXX             | FGF14  | IKZF1  | MLH1    | PAK3    | RAD52   | TET2     |
| ATM     | CDC73    | DDR2             | FGF19  | IL7R   | MLL     | PAK7    | RAD54L  | TGFBR2   |
| ATR     | CDH1     | DIS3             | FGF23  | INHBA  | MLL2    | PALB2   | RAF1    | TIPARP   |
| ATRX    | CDK12    | DNMT3A           | FGF3   | IRF4   | MPL     | PARP1   | RARA    | TNFAIP3  |
| AURKA   | CDK4     | DOT1L            | FGF4   | IRS2   | MRE11A  | PARP2   | RB1     | TNFRSF14 |
| AURKB   | CDK6     | EGFR             | FGF6   | JAK1   | MSH2    | PARP3   | REL     | TOP1     |
| AXL     | CDK8     | EMSY             | FGF7   | JAK2   | MSH6    | PARP4   | RET     | TP53     |
| BACH1   | GRIN2A   | EP300            | FGFR1  | JAK3   | MTOR    | PAX5    | RICTOR  | TRRAP    |
| BAP1    | SPOP     | EPHA3            | FGFR2  | JUN    | MUTYH   | PDGFRA  | RNF43   | TSC1     |
| BARD1   | SETD2    | EPHA5            | FGFR3  | KDM5A  | MYC     | PDGFRB  | RPA1    | TSC2     |
| BCL2    | PBRM1    | EPHB1            | FGFR4  | KDM5C  | MYCL1   | PDK1    | RPTOR   | TSHR     |
| BCL2L2  | FOXL2    | ERBB2            | FLT1   | KDM6A  | MYCN    | PIK3C2G | RUNX1   | VHL      |
| BCL6    | CTNNA1   | ERBB3            | FLT3   | KDR    | MYD88   | PIK3C3  | RUNX1T1 | WISP3    |
| BCOR    | CDKN1B   | ERBB4            | FLT4   | KEAP1  | MYST3   | PIK3CA  | SF3B1   | WT1      |
| BCORL1  | CDKN2A   | ERG              | GATA1  | KIT    | NBN     | PIK3CG  | SH2B3   | XPO1     |
| BLM     | CDKN2B   | ESR1             | GATA2  | KLHL6  | NCOR1   | PIK3R1  | SMAD2   | XRCC3    |
| BRAF    | CDKN2C   | EZH2             | GATA3  | KRAS   | NF1     | PIK3R2  | SMAD4   | ZNF217   |
| BRCA1   | CEBPA    | FAM123B<br>(WTX) | GNA11  | LMO1   | NF2     | PMS2    | SMARCA4 | ZNF703   |
| BRCA2   | CHEK1    | FAM46C           | GNA13  | LRP1B  | NFE2L2  | PNRC1   | SMARCB1 |          |

**Genes targeted for rearrangement detection**

|      |      |      |      |       |       |        |      |         |
|------|------|------|------|-------|-------|--------|------|---------|
| ALK  | BRAF | ETV1 | ETV5 | EWSR1 | MYC   | PDGFRA | RARA | ROS1    |
| BCL2 | EGFR | ETV4 | ETV6 | MLL   | NTRK1 | RAF1   | RET  | TMPRSS2 |
| BCR  |      |      |      |       |       |        |      |         |



**Supplementary Table 1B**  
**Genes targeted in hybridization capture (earlier test)**

|        |        |        |         |          |        |        |         |         |
|--------|--------|--------|---------|----------|--------|--------|---------|---------|
| ABL1   | BRAF   | CEBPA  | ERG     | HSP90AA1 | MAP2K1 | NF2    | PTEN    | SUFU    |
| ABL2   | BRCA1  | CHEK1  | ESR1    | IDH1     | MAP2K2 | NKX2-1 | PTPN11  | TBX22   |
| AKT1   | BRCA2  | CHEK2  | EZH2    | IDH2     | MAP2K4 | NOTCH1 | PTPRD   | TET2    |
| AKT2   | CARD11 | CRKL   | FANCA   | IGF1R    | MCL1   | NPM1   | RAF1    | TGFBR2  |
| AKT3   | CBL    | CRLF2  | FBXW7   | IGF2R    | MDM2   | NRAS   | RARA    | TNFAIP3 |
| ALK    | CCND1  | CTNNB1 | FGFR1   | IKBKE    | MDM4   | NTRK1  | RB1     | TNKS    |
| APC    | CCND2  | DDR2   | FGFR2   | IKZF1    | MEN1   | NTRK2  | RET     | TNKS2   |
| AR     | CCND3  | DNMT3A | FGFR3   | INHBA    | MET    | NTRK3  | RICTOR  | TOP1    |
| ARAF   | CCNE1  | DOT1L  | FGFR4   | INSR     | MITF   | PAK3   | RPTOR   | TP53    |
| ARFRP1 | CD79A  | EGFR   | FLT1    | IRS2     | MLH1   | PAX5   | RUNX1   | TSC1    |
| ARID1A | CD79B  | EPHA3  | FLT3    | JAK1     | MLL    | PDGFRA | SMAD2   | TSC2    |
| ATM    | CDH1   | EPHA5  | FLT4    | JAK2     | MPL    | PDGFRB | SMAD3   | USP9X   |
| ATR    | CDH2   | EPHA6  | FOXP4   | JAK3     | MRE11A | PHLPP2 | SMAD4   | VHL     |
| AURKA  | CDH20  | EPHA7  | GATA1   | JUN      | MSH2   | PIK3CA | SMARCA4 | WT1     |
| AURKB  | CDH5   | EPHB1  | GNA11   | KDM6A    | MSH6   | PIK3CG | SMARCB1 |         |
| BAP1   | CDK4   | EPHB4  | GNAQ    | KDR      | MTOR   | PIK3R1 | SMO     |         |
| BCL2   | CDK6   | EPHB6  | GNAS    | KIT      | MUTYH  | PKHD1  | SOX10   |         |
| BCL2A1 | CDK8   | ERBB2  | GPR124  | KRAS     | MYC    | PLCG1  | SOX2    |         |
| BCL2L1 | CDKN2A | ERBB3  | GUCY1A2 | LRP1B    | MYCL1  | PRKDC  | SRC     |         |
| BCL2L2 | CDKN2B | ERBB4  | HOXA3   | LRP6     | MYCN   | PTCH1  | STAT3   |         |
| BCL6   | CDKN2C | ERCC2  | HRAS    | LTK      | NF1    | PTCH2  | STK11   |         |

**Genes targeted for rearrangement detection**

|     |      |      |      |       |      |      |     |         |
|-----|------|------|------|-------|------|------|-----|---------|
| ALK | BRAF | ETV1 | ETV5 | EWSR1 | RAF1 | RARA | RET | TMPRSS2 |
| BCR | EGFR | ETV4 | ETV6 | MLL   |      |      |     |         |

**Supplementary Table 1 notes:**

Genes are identified by HUGO nomenclature. The total gene count for the current test (Supplementary Table 1A) is 295 genes and the total gene count for the earlier test (Supplementary Table 1B) is 189 genes.

**Supplementary Table 2A****Summary of cell-lines used for assessment of base substitution detection**

| <b>Cell line</b> | <b>Pool</b> | <b>Number of known heterozygous SNP sites</b> | <b>Number of known homozygous SNP sites</b> |
|------------------|-------------|-----------------------------------------------|---------------------------------------------|
| NA07014          | pool XX     | 210                                           | 102                                         |
| NA10840          | pool XX     | 195                                           | 117                                         |
| NA18595          | pool XX     | 248                                           | 127                                         |
| NA18957          | pool XX     | 236                                           | 123                                         |
| NA18488          | pool XX     | 183                                           | 123                                         |
| NA18511          | pool XX     | 259                                           | 120                                         |
| NA18867          | pool XX     | 276                                           | 128                                         |
| NA18924          | pool XX     | 160                                           | 156                                         |
| NA19108          | pool XX     | 243                                           | 121                                         |
| NA19114          | pool XX     | 235                                           | 122                                         |
| NA12386          | pool YY     | 189                                           | 110                                         |
| NA12767          | pool YY     | 187                                           | 124                                         |
| NA18618          | pool YY     | 200                                           | 137                                         |
| NA19059          | pool YY     | 161                                           | 149                                         |
| NA19147          | pool YY     | 272                                           | 119                                         |
| NA19179          | pool YY     | 257                                           | 112                                         |
| NA19190          | pool YY     | 249                                           | 131                                         |
| NA19214          | pool YY     | 229                                           | 124                                         |
| NA19235          | pool YY     | 238                                           | 138                                         |
| NA19247          | pool YY     | 223                                           | 156                                         |

## Supplementary Table 2B

### Summary of sequencing metrics for cell-lines and pools used for assessment of base substitution detection

| Normal HapMap cell line | Total read pairs | Fraction uniquely aligned to hg19 | On-target unique read pairs | Median exon coverage | Fraction exons covered $\geq 100x$ | Sequence error rate |
|-------------------------|------------------|-----------------------------------|-----------------------------|----------------------|------------------------------------|---------------------|
| NA07014                 | 19,124,723       | 92%                               | 7,364,455                   | 360                  | 100%                               | 0.34%               |
| NA10840                 | 16,332,031       | 92%                               | 6,509,830                   | 319                  | 100%                               | 0.34%               |
| NA18595                 | 17,422,928       | 92%                               | 6,849,036                   | 335                  | 100%                               | 0.35%               |
| NA18957                 | 23,172,522       | 91%                               | 8,979,557                   | 438                  | 100%                               | 0.27%               |
| NA18488                 | 23,980,245       | 91%                               | 8,908,221                   | 438                  | 100%                               | 0.36%               |
| NA18511                 | 22,972,561       | 92%                               | 8,569,119                   | 416                  | 100%                               | 0.35%               |
| NA18867                 | 18,482,783       | 92%                               | 7,252,368                   | 357                  | 100%                               | 0.35%               |
| NA18924                 | 17,304,309       | 91%                               | 6,698,243                   | 331                  | 100%                               | 0.35%               |
| NA19108                 | 22,123,874       | 92%                               | 8,497,021                   | 412                  | 100%                               | 0.35%               |
| NA19114                 | 18,786,684       | 92%                               | 7,388,077                   | 354                  | 100%                               | 0.27%               |
| NA12386                 | 16,937,149       | 92%                               | 6,669,594                   | 325                  | 100%                               | 0.26%               |
| NA12767                 | 17,654,744       | 92%                               | 6,935,027                   | 343                  | 100%                               | 0.26%               |
| NA18618                 | 23,619,618       | 91%                               | 9,224,735                   | 457                  | 100%                               | 0.27%               |
| NA19059                 | 21,789,629       | 92%                               | 8,203,279                   | 407                  | 100%                               | 0.27%               |
| NA19147                 | 16,340,118       | 91%                               | 6,320,632                   | 315                  | 100%                               | 0.27%               |
| NA19179                 | 25,175,272       | 91%                               | 9,471,701                   | 466                  | 100%                               | 0.27%               |
| NA19190                 | 23,514,670       | 92%                               | 9,123,334                   | 443                  | 100%                               | 0.28%               |
| NA19214                 | 19,183,067       | 91%                               | 7,434,387                   | 365                  | 100%                               | 0.28%               |
| NA19235                 | 24,336,984       | 91%                               | 9,519,772                   | 468                  | 100%                               | 0.28%               |
| NA19247                 | 23,490,106       | 91%                               | 8,827,832                   | 420                  | 100%                               | 0.29%               |

| Pool ID | Number of cell lines in pool | Total read pairs | Fraction uniquely aligned to hg19 | On-target unique read pairs | Median exon coverage | Fraction exons covered $\geq 100x$ | Sequence error rate |
|---------|------------------------------|------------------|-----------------------------------|-----------------------------|----------------------|------------------------------------|---------------------|
| pool XX | 10                           | 51,303,128       | 92%                               | 15,700,438                  | 753                  | 100%                               | 0.32%               |
| pool YY | 10                           | 35,501,862       | 92%                               | 12,145,181                  | 597                  | 100%                               | 0.32%               |

#### Supplementary Table 2 notes:

Pure cell lines used to establish the base substitution test set were sequenced at reduced coverage, as alterations in pure cell lines are expected to be present at high alternate allele frequencies.

**Supplementary Table 3****Distribution of expected mutant allele frequencies in base substitution test set**

| <b>Expected mutant allele frequency</b> | <b>Number of sites in pool XX</b> | <b>Number of sites in pool YY</b> |
|-----------------------------------------|-----------------------------------|-----------------------------------|
| < 5%                                    | 206                               | 201                               |
| 5 - 10%                                 | 314                               | 300                               |
| 10 - 15%                                | 130                               | 103                               |
| 15 - 20%                                | 75                                | 78                                |
| 20 - 25%                                | 64                                | 42                                |
| 25 - 30%                                | 41                                | 27                                |
| 30 - 35%                                | 29                                | 31                                |
| 35 - 40%                                | 21                                | 24                                |
| 40 - 45%                                | 24                                | 16                                |
| 45 - 50%                                | 20                                | 25                                |
| 50 - 55%                                | 11                                | 12                                |
| 55 - 60%                                | 9                                 | 11                                |
| 60 - 65%                                | 12                                | 24                                |
| 65 - 70%                                | 12                                | 14                                |
| 70 - 75%                                | 9                                 | 17                                |
| 75 - 80%                                | 16                                | 9                                 |
| 80 - 85%                                | 11                                | 16                                |
| 85 - 90%                                | 21                                | 12                                |
| 90 - 95%                                | 17                                | 13                                |
| 95 - 100%                               | 15                                | 25                                |
| Total                                   | 1,057                             | 1,000                             |

**Supplementary Table 4A**  
**Summary of base substitution detection performance (sensitivity)**

| Down-sampled coverage | MAF < 5%<br>n = 407 |       |                     | MAF 5 - 10%<br>n = 614 |       |                     | MAF > 10%<br>n = 1,036 |       |                     |
|-----------------------|---------------------|-------|---------------------|------------------------|-------|---------------------|------------------------|-------|---------------------|
|                       | False negatives     | Mean  | Confidence interval | False negatives        | Mean  | Confidence interval | False negatives        | Mean  | Confidence interval |
| 738, 580              | 6                   | 98.5% | 96.8 – 99.5%        | 2                      | 99.7% | 98.8 – 100%         | 0                      | 100%  | 99.6 – 100%         |
| 500                   | 16                  | 96.1% | 93.7 – 97.7%        | 4                      | 99.3% | 98.3 – 99.8%        | 0                      | 100%  | 99.6 – 100%         |
| 450                   | 20                  | 95.1% | 92.5 – 97.0%        | 4                      | 99.3% | 98.3 – 99.8%        | 0                      | 100%  | 99.6 – 100%         |
| 400                   | 24                  | 94.1% | 91.4 – 96.2%        | 3                      | 99.5% | 98.6 – 99.9%        | 0                      | 100%  | 99.6 – 100%         |
| 350                   | 43                  | 89.4% | 86.0 – 92.2%        | 5                      | 99.2% | 98.1 – 99.7%        | 0                      | 100%  | 99.6 – 100%         |
| 300                   | 67                  | 83.5% | 80.0 – 87.0%        | 7                      | 98.9% | 97.7 – 99.5%        | 0                      | 100%  | 99.6 – 100%         |
| 250                   | 104                 | 74.4% | 69.9 – 78.6%        | 13                     | 97.9% | 96.4 – 98.9%        | 1                      | 99.9% | 99.5 – 100%         |
| 200                   | 149                 | 63.4% | 58.5 – 68.1%        | 36                     | 94.1% | 92.0 – 95.9%        | 1                      | 99.9% | 99.5 – 100%         |
| 150                   | 227                 | 44.2% | 39.3 – 49.2%        | 105                    | 82.3% | 79.7 – 85.8%        | 5                      | 99.5% | 98.9 – 99.8%        |

**Supplementary Table 4B**  
**Summary of base substitution detection performance (specificity)**

| Down-sampled coverage | True positives | False positives |          | Positive predictive value |                     |
|-----------------------|----------------|-----------------|----------|---------------------------|---------------------|
|                       |                | MAF ≥ 5%        | MAF < 5% | Mean                      | Confidence interval |
| 738, 580              | 2,577          | 0               | 2        | 99.9%                     | 99.7 – 100%         |
| 500                   | 2,564          | 0               | 0        | 100%                      | 99.9 – 100%         |
| 450                   | 2,557          | 0               | 0        | 100%                      | 99.9 – 100%         |
| 400                   | 2,550          | 0               | 0        | 100%                      | 99.9 – 100%         |
| 350                   | 2,521          | 0               | 0        | 100%                      | 99.9 – 100%         |
| 300                   | 2,488          | 0               | 0        | 100%                      | 99.9 – 100%         |
| 250                   | 2,425          | 0               | 0        | 100%                      | 99.8 – 100%         |
| 200                   | 2,341          | 0               | 0        | 100%                      | 99.8 – 100%         |
| 150                   | 2,148          | 0               | 0        | 100%                      | 99.8 – 100%         |

**Supplementary Table 4C**  
**Summary of base substitution detection performance (full sensitivity results)**

Available in online materials

Supplementary Table 4 notes:

Confidence intervals were calculated as the exact 95% binomial confidence interval. False positives are base substitution calls in pooled samples that are absent from constituent cell-line sequence data. To represent typical reportable alterations, call settings for recurrent sites of mutation were applied. Initial coverage listed (738x/580x) is full read depth obtained in pools, subsequently down-sampled in-silico.

**Supplementary Table 5A**  
**Summary of tumor cell lines and known indel alterations used for assessment of indel detection**

| Tumor cell line | Gene           | Indel type | Indel length (bp) | Measured mutant allele frequency | Genomic coordinates (hg19) | Reference sequence                    | Alternate sequence                                      |
|-----------------|----------------|------------|-------------------|----------------------------------|----------------------------|---------------------------------------|---------------------------------------------------------|
| A2058           | PTEN           | Deletion   | 35                | 35%                              | chr10:89711905-89711940    | GTGTATTATTAGTACCTG<br>TTAAAGAATCATCTG | G                                                       |
| A253            | CDKN2A<br>TP53 | Deletion   | 13                | 100%                             | chr9:21974766-21974779     | CCGCGGCCGTGGCC                        | C                                                       |
|                 |                | Deletion   | 1                 | 100%                             | chr17:7578390-7578391      | CT                                    | C                                                       |
| A549            | SMARCA4        | Deletion   | 23                | 100%                             | chr19:11121116-11121139    | TGCAGTCTACTATGCCGTG<br>GCCC           | T                                                       |
| AGS             | CDH1           | Insertion  | 1                 | 100%                             | chr16:68855925-68855925    | C                                     | CC                                                      |
| AsPC-1          | CDKN2A<br>TP53 | Deletion   | 2                 | 97%                              | chr9:21971126-21971128     | GAG                                   | G                                                       |
|                 |                | Deletion   | 1                 | 95%                              | chr17:7578529-7578530      | AA                                    | A                                                       |
| CCRF-CEM        | NOTCH1         | Insertion  | 36                | 47%                              | chr9:139399385-139399385   | G                                     | GTGGGGAAGGCGCGGCAG<br>GAAGTGAAGGAGCTGTTG                |
| DU-145          | STK11          | Deletion   | 5                 | 100%                             | chr19:1220438-1220443      | CAAGCC                                | C                                                       |
| HCC1187         | NFKBIA<br>TP53 | Insertion  | 1                 | 100%                             | chr14:35872476-35872476    | G                                     | GG                                                      |
|                 |                | Deletion   | 3                 | 100%                             | chr17:7579362-7579365      | AACC                                  | A                                                       |
| HCC1395         | -              | -          | -                 | -                                | -                          | -                                     |                                                         |
| HCC1599         | BRCA2          | Deletion   | 10                | 99%                              | chr13:32913041-32913051    | AAAGAACCTAC                           | A                                                       |
| HCC1937         | BRCA1          | Insertion  | 1                 | 96%                              | chr17:41209082-41209082    | G                                     | GG                                                      |
| HCT-15          | APC            | Deletion   | 1                 | 100%                             | chr5:112175538-112175539   | GC                                    | G                                                       |
|                 | BRCA2          | Deletion   | 1                 | 44%                              | chr13:32913842-32913843    | AA                                    | A                                                       |
|                 | BRCA2          | Deletion   | 2                 | 50%                              | chr13:32912090-32912092    | TGT                                   | T                                                       |
|                 | MSH6           | Deletion   | 1                 | 49%                              | chr2:48025989-48025990     | CC                                    | C                                                       |
| J-RT3-T3-5      | PTEN           | Insertion  | 7                 | 44%                              | chr10:89717675-89717675    | C                                     | CCCCATGG<br>CCTGAAGTTCATGTACTTTG<br>AGTTCCTCAGCCCTGGGTT |
|                 | PTEN           | Insertion  | 39                | 45%                              | chr10:89717712-89717712    | C                                     | T                                                       |
|                 | TP53           | Deletion   | 1                 | 43%                              | chr17:7573943-7573944      | TC                                    | C                                                       |
| LoVo            | SMO            | Insertion  | 6                 | 40%                              | chr7:128829061-128829061   | G                                     | GCTGCTG                                                 |
|                 | APC            | Deletion   | 1                 | 63%                              | chr5:112175580-112175581   | CC                                    | C                                                       |
|                 | NF1            | Deletion   | 1                 | not found <sup>a</sup>           | -                          | -                                     | -                                                       |
| MV-4-11         | FLT3           | Insertion  | 30                | 64%                              | chr13:28608284-28608284    | T                                     | TGATCATATTCATTTCTCTG<br>AAATCAACGT                      |
| NCI-H128        | ARID1A         | Deletion   | 1                 | 38%                              | chr1:27092812-27092813     | GG                                    | G                                                       |
|                 | CUL4B          | Deletion   | 3                 | 97%                              | chrX:119694438-119694441   | TCCT                                  | T                                                       |
|                 | RB1            | Deletion   | 1                 | 95%                              | chr13:48951089-48951090    | AA                                    | A                                                       |
| NCI-H146        | TP53           | Deletion   | 19                | 100%                             | chr17:7576874-7576893      | ATCCAGTGGTTCTTCTTTG                   | A                                                       |
| NCI-H1693       | SMARCA4        | Deletion   | 17                | 100%                             | chr19:11138497-11138514    | CTTGATAGAATTCCTCCC                    | C                                                       |
| NCI-H2009       | EPHB1          | Deletion   | 1                 | not found <sup>a</sup>           | -                          | -                                     | -                                                       |
| NCI-H2122       | CDH1           | Deletion   | 18                | 95%                              | chr16:68842431-68842449    | AGAAAATGAAAAGGCCCA                    | A                                                       |
|                 | PARP1          | Deletion   | 1                 | 66%                              | chr1:226551693-226551694   | CC                                    | C                                                       |
|                 | STK11          | Deletion   | 1                 | 90%                              | chr19:1221318-1221319      | CC                                    | C                                                       |
| NCI-H2228       | RB1            | Deletion   | 1                 | 93%                              | chr13:48934154-48934155    | GG                                    | G                                                       |
| NCI-H727        | TP53           | Insertion  | 9                 | 85%                              | chr17:7578443-7578443      | A                                     | ACTGCTTGTA                                              |
| RL95-2          | BRCA2          | Insertion  | 1                 | 43%                              | chr13:32912776-32912776    | T                                     | TT                                                      |
|                 | BRCA2          | Insertion  | 1                 | 44%                              | chr13:32913957-32913957    | A                                     | AA                                                      |
|                 | PTEN           | Insertion  | 1                 | 37%                              | chr10:89720817-89720817    | A                                     | AA                                                      |
|                 | NF2            | Deletion   | 1                 | 47%                              | chr22:30050711-30050712    | AA                                    | A                                                       |
|                 | PTEN           | Deletion   | 1                 | 43%                              | chr10:89720816-89720817    | AA                                    | A                                                       |
|                 | TP53           | Deletion   | 3                 | 41%                              | chr17:7578200-7578203      | CCAC                                  | C                                                       |
| SCC-9           | TP53           | Deletion   | 32                | 100%                             | chr17:7577084-7577116      | TCTGTGCGCCGGTCTCCCA<br>GGACAGGCACAA   | T                                                       |
| SW1417          | TP53           | Deletion   | 14                | 98%                              | chr17:7577557-7577571      | AGGAACTGTTACACA                       | A                                                       |
| SW48            | BRCA2          | Deletion   | 1                 | 41% <sup>b</sup>                 | chr13:32913842-32913843    | AA                                    | A                                                       |
|                 | FBXW7          | Deletion   | 1                 | 43%                              | chr4:153244160-153244161   | CC                                    | C                                                       |
| THP-1           | TP53           | Deletion   | 26                | 97%                              | chr17:7578386-7578412      | AGCGCTCATGGTGGGGCA<br>GCGCCTCA        | A                                                       |
| TUR             | PTEN           | Insertion  | 4                 | 93%                              | chr10:89692905-89692905    | G                                     | GCCCC                                                   |

Supplementary Table 5A notes:

<sup>a</sup> No evidence for presence of event in sequence data, excluded from sensitivity analysis.

<sup>b</sup> Indel not in COSMIC database for SW48, but identical to indel in HCT-15.

## Supplementary Table 5B

### Sequencing metrics for tumor cell lines used for assessment of indel detection

| Tumor cell line | Total read pairs | Fraction uniquely aligned to hg19 | On-target unique read pairs | Median exon coverage | Fraction exons covered >= 100x | Sequence error rate |
|-----------------|------------------|-----------------------------------|-----------------------------|----------------------|--------------------------------|---------------------|
| A2058           | 22,634,933       | 91%                               | 7,666,148                   | 373                  | 100%                           | 0.37%               |
| A253            | 18,157,377       | 92%                               | 6,564,360                   | 304                  | 98%                            | 0.40%               |
| A549            | 17,816,231       | 91%                               | 6,186,531                   | 300                  | 99%                            | 0.38%               |
| AGS             | 24,118,544       | 92%                               | 8,016,723                   | 371                  | 100%                           | 0.40%               |
| AsPC-1          | 23,431,383       | 92%                               | 8,119,725                   | 402                  | 100%                           | 0.39%               |
| CCRF-CEM        | 19,272,769       | 92%                               | 6,486,064                   | 312                  | 100%                           | 0.40%               |
| DU-145          | 20,787,366       | 91%                               | 7,927,454                   | 386                  | 99%                            | 0.37%               |
| HCC1187         | 13,034,172       | 91%                               | 4,731,947                   | 224                  | 98%                            | 0.38%               |
| HCC1395         | 17,785,269       | 91%                               | 6,844,908                   | 331                  | 98%                            | 0.36%               |
| HCC1599         | 25,317,227       | 92%                               | 9,089,866                   | 436                  | 99%                            | 0.38%               |
| HCC1937         | 16,879,720       | 92%                               | 6,325,353                   | 309                  | 97%                            | 0.36%               |
| HCT-15          | 20,597,740       | 92%                               | 7,395,353                   | 354                  | 100%                           | 0.39%               |
| J-RT3-T3-5      | 18,481,482       | 92%                               | 6,318,735                   | 302                  | 99%                            | 0.37%               |
| LoVo            | 22,913,590       | 91%                               | 7,301,191                   | 338                  | 100%                           | 0.37%               |
| MV-4-11         | 20,115,065       | 92%                               | 6,494,045                   | 315                  | 100%                           | 0.37%               |
| NCI-H128        | 20,654,831       | 91%                               | 7,209,021                   | 356                  | 100%                           | 0.40%               |
| NCI-H146        | 18,413,662       | 92%                               | 6,235,752                   | 295                  | 99%                            | 0.37%               |
| NCI-H1693       | 17,973,760       | 92%                               | 6,749,231                   | 333                  | 97%                            | 0.37%               |
| NCI-H2009       | 19,010,570       | 92%                               | 6,273,869                   | 293                  | 98%                            | 0.37%               |
| NCI-H2122       | 19,957,036       | 91%                               | 7,207,395                   | 344                  | 99%                            | 0.35%               |
| NCI-H2228       | 24,226,669       | 92%                               | 8,766,637                   | 416                  | 100%                           | 0.38%               |
| NCI-H727        | 19,853,855       | 92%                               | 6,798,088                   | 328                  | 99%                            | 0.37%               |
| RL95-2          | 16,165,504       | 92%                               | 5,828,319                   | 279                  | 99%                            | 0.39%               |
| SCC-9           | 19,900,014       | 91%                               | 6,492,864                   | 305                  | 99%                            | 0.38%               |
| SW1417          | 18,515,389       | 92%                               | 6,456,540                   | 309                  | 99%                            | 0.36%               |
| SW48            | 17,235,671       | 92%                               | 6,360,536                   | 298                  | 100%                           | 0.38%               |
| THP-1           | 24,543,517       | 91%                               | 8,748,070                   | 426                  | 99%                            | 0.36%               |
| TUR             | 20,843,773       | 92%                               | 6,938,859                   | 339                  | 100%                           | 0.37%               |

#### Supplementary Table 5B notes:

Pure cell lines used to establish indel test set were sequenced at reduced average coverage in comparison with pooled samples. As many tumor cell lines carry homozygous deletions, all exons are not expected to be covered >100x.

**Supplementary Table 6A**  
**Summary of tumor cell line pools used for assessment of indel detection**

**Pools of two cell lines (14)**

| Pool   | Components |           |
|--------|------------|-----------|
| pool A | NCI-H1693  | TUR       |
| pool B | NCI-H146   | THP-1     |
| pool C | A549       | HCT-15    |
| pool D | A253       | NCI-H2122 |
| pool E | J.RT3-T3.5 | NCI-H2228 |
| pool F | AsPC-1     | DU-145    |
| pool G | NCI-H128   | NCI-H727  |
| pool H | NCI-H2009  | SW1417    |
| pool I | CCRF-CEM   | HCC1395   |
| pool J | AGS        | HCC1187   |
| pool K | HCC1937    | SCC-9     |
| pool L | HCC1599    | MV-4-11   |
| pool M | A2058      | LoVo      |
| pool N | RL95-2     | SW48      |

**Pools of three cell lines (8)**

|        |          |            |          |
|--------|----------|------------|----------|
| pool O | HCC1187  | J.RT3-T3.5 | MV-4-11  |
| pool P | NCI-H128 | NCI-H2122  | NCI-H727 |
| pool Q | AGS      | NCI-H2009  | RL95-2   |
| pool R | HCC1937  | SW48       | TUR      |
| pool S | LoVo     | SCC-9      | THP-1    |
| pool T | CCRF-CEM | HCC1599    | HCT-15   |
| pool U | A253     | AsPC-1     | NCI-H146 |
| pool V | A2058    | A549       | DU-145   |

**Pools of four cell lines (9)**

|         |         |           |           |            |
|---------|---------|-----------|-----------|------------|
| pool W  | HCC1395 | NCI-H1693 | NCI-H2228 | SW1417     |
| pool X  | HCC1187 | MV-4-11   | NCI-H1693 | RL95-2     |
| pool Y  | A2058   | A549      | NCI-H2228 | TUR        |
| pool Z  | HCC1395 | SCC-9     | SW1417    | THP-1      |
| pool AA | A253    | AGS       | CCRF-CEM  | J.RT3-T3.5 |
| pool BB | DU-145  | HCC1937   | LoVo      | NCI-H128   |
| pool CC | HCC1599 | HCT-15    | NCI-H146  | SW48       |
| pool DD | AsPC-1  | NCI-H2009 | NCI-H2122 | NCI-H727   |
| pool EE | AGS     | DU-145    | MV-4-11   | SCC-9      |

**Pools of five cell lines (8)**

|         |          |           |           |            |           |
|---------|----------|-----------|-----------|------------|-----------|
| pool FF | A549     | AGS       | DU-145    | HCT-15     | TUR       |
| pool GG | A2058    | NCI-H2122 | NCI-H727  | RL95-2     | THP-1     |
| pool HH | A253     | HCC1395   | LoVo      | NCI-H146   | SCC-9     |
| pool II | CCRF-CEM | HCC1599   | NCI-H128  | NCI-H2228  | SW48      |
| pool JJ | HCC1599  | HCC1937   | MV-4-11   | NCI-H1693  | NCI-H2009 |
| pool KK | A2058    | HCC1395   | NCI-H1693 | NCI-H2009  | NCI-H2228 |
| pool LL | AGS      | AsPC-1    | DU-145    | MV-4-11    | SCC-9     |
| pool MM | AsPC-1   | HCC1187   | HCC1937   | J.RT3-T3.5 | SW1417    |

**Pools of six cell lines (1)**

|         |        |         |            |      |           |
|---------|--------|---------|------------|------|-----------|
| pool NN | A253   | HCC1187 | J.RT3-T3.5 | LoVo | NCI-H2122 |
|         | SW1417 |         |            |      |           |

**Pools of ten cell lines (1)**

|         |          |          |        |          |          |
|---------|----------|----------|--------|----------|----------|
| pool OO | A549     | CCRF-CEM | HCT-15 | NCI-H128 | NCI-H146 |
|         | NCI-H727 | RL95-2   | SW48   | THP-1    | TUR      |



## Supplementary Table 6B

### Sequencing metrics for cell line pools used for assessment of indel detection

| Pool ID | Number of cell lines in pool | Total read pairs | Fraction uniquely aligned to hg19 | On-target unique read pairs | Median exon coverage | Fraction exons covered $\geq 100x$ | Sequence error rate |
|---------|------------------------------|------------------|-----------------------------------|-----------------------------|----------------------|------------------------------------|---------------------|
| pool A  | 2                            | 56,997,382       | 92%                               | 17,929,700                  | 871                  | 100%                               | 0.34%               |
| pool B  | 2                            | 48,694,571       | 92%                               | 15,462,657                  | 739                  | 100%                               | 0.34%               |
| pool C  | 2                            | 55,572,417       | 92%                               | 16,738,366                  | 787                  | 100%                               | 0.35%               |
| pool D  | 2                            | 47,141,202       | 92%                               | 15,500,432                  | 755                  | 99%                                | 0.36%               |
| pool E  | 2                            | 38,432,222       | 92%                               | 12,847,382                  | 613                  | 100%                               | 0.36%               |
| pool F  | 2                            | 59,996,187       | 91%                               | 17,765,328                  | 840                  | 100%                               | 0.37%               |
| pool G  | 2                            | 46,596,923       | 91%                               | 14,822,939                  | 736                  | 100%                               | 0.34%               |
| pool H  | 2                            | 59,444,095       | 92%                               | 17,702,973                  | 825                  | 100%                               | 0.33%               |
| pool I  | 2                            | 52,122,793       | 92%                               | 17,313,786                  | 834                  | 100%                               | 0.31%               |
| pool J  | 2                            | 40,776,658       | 92%                               | 13,403,473                  | 647                  | 100%                               | 0.32%               |
| pool K  | 2                            | 35,979,025       | 92%                               | 12,228,130                  | 590                  | 100%                               | 0.31%               |
| pool L  | 2                            | 28,147,995       | 92%                               | 9,950,582                   | 488                  | 100%                               | 0.43%               |
| pool M  | 2                            | 42,839,903       | 92%                               | 13,657,350                  | 649                  | 100%                               | 0.30%               |
| pool N  | 2                            | 32,407,654       | 92%                               | 11,040,621                  | 531                  | 100%                               | 0.30%               |
| pool O  | 3                            | 48,140,867       | 92%                               | 14,805,569                  | 703                  | 100%                               | 0.31%               |
| pool P  | 3                            | 36,466,712       | 92%                               | 12,288,023                  | 605                  | 100%                               | 0.44%               |
| pool Q  | 3                            | 45,502,492       | 92%                               | 14,650,015                  | 697                  | 100%                               | 0.43%               |
| pool R  | 3                            | 39,033,530       | 92%                               | 13,046,950                  | 634                  | 100%                               | 0.34%               |
| pool S  | 3                            | 41,299,953       | 92%                               | 13,204,933                  | 645                  | 100%                               | 0.35%               |
| pool T  | 3                            | 37,251,264       | 92%                               | 11,857,641                  | 579                  | 100%                               | 0.35%               |
| pool U  | 3                            | 36,059,025       | 92%                               | 11,274,897                  | 533                  | 100%                               | 0.35%               |
| pool V  | 3                            | 35,912,841       | 91%                               | 11,312,939                  | 554                  | 100%                               | 0.35%               |
| pool W  | 4                            | 48,919,377       | 92%                               | 15,104,316                  | 719                  | 100%                               | 0.34%               |
| pool X  | 4                            | 40,021,398       | 92%                               | 13,454,664                  | 667                  | 100%                               | 0.30%               |
| pool Y  | 4                            | 45,584,864       | 92%                               | 14,473,673                  | 709                  | 100%                               | 0.30%               |
| pool Z  | 4                            | 41,980,486       | 92%                               | 14,108,281                  | 677                  | 100%                               | 0.31%               |
| pool AA | 4                            | 52,663,991       | 92%                               | 16,326,344                  | 776                  | 100%                               | 0.34%               |
| pool BB | 4                            | 53,572,468       | 92%                               | 17,063,546                  | 817                  | 100%                               | 0.34%               |
| pool CC | 4                            | 46,024,523       | 92%                               | 15,010,423                  | 721                  | 100%                               | 0.34%               |
| pool DD | 4                            | 66,455,797       | 92%                               | 19,117,598                  | 898                  | 100%                               | 0.36%               |
| pool EE | 4                            | 44,255,734       | 92%                               | 13,611,473                  | 646                  | 100%                               | 0.44%               |
| pool FF | 5                            | 45,781,116       | 92%                               | 14,602,374                  | 693                  | 100%                               | 0.37%               |
| pool GG | 5                            | 49,662,505       | 92%                               | 16,125,949                  | 778                  | 100%                               | 0.33%               |
| pool HH | 5                            | 31,463,295       | 92%                               | 10,597,876                  | 510                  | 100%                               | 0.33%               |
| pool II | 5                            | 53,921,196       | 92%                               | 17,056,368                  | 823                  | 100%                               | 0.34%               |
| pool JJ | 5                            | 49,921,714       | 92%                               | 15,905,111                  | 761                  | 100%                               | 0.31%               |
| pool KK | 5                            | 45,745,404       | 92%                               | 14,735,480                  | 697                  | 100%                               | 0.43%               |
| pool LL | 5                            | 45,313,285       | 92%                               | 13,006,280                  | 632                  | 100%                               | 0.31%               |
| pool MM | 5                            | 52,922,680       | 92%                               | 16,733,324                  | 797                  | 100%                               | 0.44%               |
| pool NN | 6                            | 44,477,558       | 92%                               | 14,835,358                  | 711                  | 100%                               | 0.30%               |
| pool OO | 10                           | 55,203,747       | 92%                               | 16,756,696                  | 814                  | 100%                               | 0.31%               |

**Supplementary Table 7A**  
**Summary of indel detection performance (sensitivity)**

| Down-sampled coverage | MAF < 10%<br>n = 60 |       |                     | MAF 10 - 20%<br>n = 73 |       |                     | MAF > 20%<br>n = 94 |       |                     |
|-----------------------|---------------------|-------|---------------------|------------------------|-------|---------------------|---------------------|-------|---------------------|
|                       | False negatives     | Mean  | Confidence interval | False negatives        | Mean  | Confidence interval | False negatives     | Mean  | Confidence interval |
| 667                   | 7                   | 88.3% | 77.4 – 95.2%        | 2                      | 97.3% | 90.5 – 99.7%        | 2                   | 97.9% | 92.5 – 99.7%        |
| 500                   | 11                  | 81.7% | 69.6 – 90.5%        | 2                      | 97.3% | 90.5 – 99.7%        | 2                   | 97.9% | 92.5 – 99.7%        |
| 430                   | 12                  | 80.0% | 67.7 – 89.2%        | 2                      | 97.3% | 90.5 – 99.7%        | 2                   | 97.9% | 92.5 – 99.7%        |
| 355                   | 16                  | 73.3% | 60.3 – 83.9%        | 3                      | 95.9% | 88.5 – 99.1%        | 2                   | 97.9% | 92.5 – 99.7%        |
| 276                   | 21                  | 65.0% | 51.6 – 76.7%        | 6                      | 91.8% | 82.3 – 96.9%        | 2                   | 97.9% | 92.5 – 99.7%        |
| 190                   | 21                  | 65.0% | 51.6 – 76.7%        | 10                     | 86.3% | 76.2 – 93.2%        | 2                   | 97.9% | 92.5 – 99.7%        |

**Supplementary Table 7B**  
**Summary of indel detection performance (specificity)**

| Down-sampled coverage | True positives | False positives |           | Positive predictive value |                     |
|-----------------------|----------------|-----------------|-----------|---------------------------|---------------------|
|                       |                | MAF ≥ 20%       | MAF < 20% | Mean                      | Confidence interval |
| 667                   | 875            | 0               | 3         | 99.7%                     | 99.0 – 99.9%        |
| 500                   | 873            | 0               | 0         | 100%                      | 99.6 – 100%         |
| 430                   | 871            | 0               | 3         | 99.7%                     | 99.0 – 99.9%        |
| 355                   | 873            | 0               | 1         | 99.9%                     | 99.4 – 100%         |
| 276                   | 844            | 0               | 1         | 99.9%                     | 99.3 – 100%         |
| 190                   | 790            | 0               | 5         | 99.4%                     | 98.5 – 99.8%        |

**Supplementary Table 7C**  
**Summary of indel detection performance (full sensitivity results)**

Available in online materials

Supplementary Table 7 notes:

Indel calls in pooled samples were considered to agree with indel calls in constituent cell lines, if they had the same base composition (number of each nucleotide added or deleted) and position (+/- 25bp). Confidence intervals were calculated as the exact 95% binomial confidence interval. False positives are indel calls in pooled samples that are absent from constituent cell-line sequence data. Coverage listed is the average of the median exon coverage of 41 pools. Down sampling was performed in-silico.

## Supplementary Table 8

### Known indels alterations in pure cell lines and pools not detected by Dindel algorithm

| Known indel        | Tumor cell line / Pool ID | Indel length | Expected allele frequency |
|--------------------|---------------------------|--------------|---------------------------|
| A2058_PTEN_D35     | A2058                     | 35           | 53.0%                     |
| A2058_PTEN_D35     | pool M                    | 35           | 26.4%                     |
| A2058_PTEN_D35     | pool V                    | 35           | 23.9%                     |
| A2058_PTEN_D35     | pool Y                    | 35           | 16.3%                     |
| A2058_PTEN_D35     | pool GG                   | 35           | 10.5%                     |
| A2058_PTEN_D35     | pool KK                   | 35           | 10.1%                     |
| A549_SMARCA4_D23   | pool V                    | 23           | 22.2%                     |
| A549_SMARCA4_D23   | pool OO                   | 23           | 9.3%                      |
| CCRFCEM_NOTCH1_I36 | CCRF-CEM                  | 36           | 48.0%                     |
| CCRFCEM_NOTCH1_I36 | pool I                    | 36           | 19.1%                     |
| CCRFCEM_NOTCH1_I36 | pool T                    | 36           | 16.6%                     |
| CCRFCEM_NOTCH1_I36 | pool AA                   | 36           | 7.8%                      |
| CCRFCEM_NOTCH1_I36 | pool II                   | 36           | 6.5%                      |
| CCRFCEM_NOTCH1_I36 | pool OO                   | 36           | 3.0%                      |
| JRT3T35_PTEN_I39   | J-RT3-T3-5                | 39           | 44.0%                     |
| JRT3T35_PTEN_I39   | pool E                    | 39           | 21.6%                     |
| JRT3T35_PTEN_I39   | pool O                    | 39           | 15.4%                     |
| JRT3T35_PTEN_I39   | pool AA                   | 39           | 13.9%                     |
| JRT3T35_PTEN_I39   | pool MM                   | 39           | 13.9%                     |
| JRT3T35_PTEN_I39   | pool NN                   | 39           | 6.0%                      |
| JRT3T35_PTEN_I7    | J-RT3-T3-5                | 7            | 44.0%                     |
| JRT3T35_PTEN_I7    | pool E                    | 7            | 21.6%                     |
| JRT3T35_PTEN_I7    | pool O                    | 7            | 15.4%                     |
| JRT3T35_PTEN_I7    | pool AA                   | 7            | 13.9%                     |
| JRT3T35_PTEN_I7    | pool MM                   | 7            | 13.9%                     |
| JRT3T35_PTEN_I7    | pool NN                   | 7            | 6.0%                      |
| MV411_FLT3_I30     | MV-4-11                   | 30           | 39.0%                     |
| MV411_FLT3_I30     | pool L                    | 30           | 19.0%                     |
| MV411_FLT3_I30     | pool EE                   | 30           | 8.1%                      |
| MV411_FLT3_I30     | pool O                    | 30           | 7.6%                      |
| MV411_FLT3_I30     | pool LL                   | 30           | 7.1%                      |
| MV411_FLT3_I30     | pool JJ                   | 30           | 6.0%                      |
| MV411_FLT3_I30     | pool X                    | 30           | 6.0%                      |
| NCIH727_TP53_I9    | pool P                    | 9            | 13.5%                     |
| RL952_PTEN_D1      | pool Q                    | 1            | 17.8%                     |
| RL952_PTEN_D1      | pool GG                   | 1            | 6.7%                      |
| RL952_PTEN_D1      | pool OO                   | 1            | 4.3%                      |
| RL952_PTEN_I1      | RL95-2                    | 1            | 37.0%                     |
| RL952_PTEN_I1      | pool N                    | 1            | 16.2%                     |
| RL952_PTEN_I1      | pool Q                    | 1            | 14.3%                     |
| RL952_PTEN_I1      | pool X                    | 1            | 7.3%                      |
| RL952_PTEN_I1      | pool GG                   | 1            | 5.4%                      |
| SCC9_TP53_D32      | SCC-9                     | 32           | 99.0%                     |
| SCC9_TP53_D32      | pool K                    | 32           | 30.4%                     |
| SCC9_TP53_D32      | pool S                    | 32           | 20.2%                     |
| SCC9_TP53_D32      | pool EE                   | 32           | 15.3%                     |
| SCC9_TP53_D32      | pool LL                   | 32           | 15.3%                     |
| SCC9_TP53_D32      | pool Z                    | 32           | 10.1%                     |
| SCC9_TP53_D32      | pool HH                   | 32           | 7.8%                      |
| THP1_TP53_D26      | THP-1                     | 26           | 99.0%                     |
| THP1_TP53_D26      | pool B                    | 26           | 49.9%                     |
| THP1_TP53_D26      | pool S                    | 26           | 34.7%                     |
| THP1_TP53_D26      | pool Z                    | 26           | 17.2%                     |
| THP1_TP53_D26      | pool GG                   | 26           | 13.6%                     |
| THP1_TP53_D26      | pool OO                   | 26           | 8.4%                      |

## Supplementary Table 9A

### Summary of normal and tumor cell lines used for assessment of copy number alteration detection

| Tumor cell line | Ploidy | Normal cell line | Previously known amplifications (copy number) | Previously known deletions (copy number) | Novel amplifications (copy number)                                            | Novel deletions (copy number) |
|-----------------|--------|------------------|-----------------------------------------------|------------------------------------------|-------------------------------------------------------------------------------|-------------------------------|
| HCC1143         | 3-4    | HCC1143 BL       | CCND1 (12),<br>MYC (8)                        | -                                        | AKT1 (11),<br>FGF3 (12),<br>FGF4 (12),<br>FGF19 (12),<br>MDM2 (9),<br>SRC (7) | PBRM1 (0)                     |
| HCC2218         | 2      | HCC2218 BL       | ERBB2 (9)                                     | -                                        | -                                                                             | CDH1 (0)                      |
| NCI-H1395       | 2-3    | NCI-BL1395       | MCL1 (10)                                     | -                                        | MYC (10)                                                                      | -                             |
| NCI-H1770       | 2-3    | NCI-BL1770       | MYCN (13)                                     | -                                        | -                                                                             | -                             |
| NCI-H2009       | 2      | NCI-BL2009       | MET (4) <sup>a</sup>                          | RB1 (0)                                  | FGF10 (8),<br>FGF14 (6),<br>IRS2 (6),<br>RICTOR (8)                           | -                             |
| NCI-H2122       | 2-3    | NCI-BL2122       | MYC (10)                                      | CDKN2A (0),<br>CDKN2B (0)                | -                                                                             | LRP1B (0)                     |
| NCI-H2126       | 3-4    | NCI-BL2126       | -                                             | CDKN2A (0),<br>CDKN2B (0)                | MCL1 (6),<br>RICTOR (7)                                                       | LRP1B (0)                     |

Supplementary Table 9A notes:

<sup>a</sup> MET was not found to be significantly amplified in NCI-H2009 (4 copies) and was excluded from the analysis.

## Supplementary Table 9B

### Sequencing metrics for normal and tumor cell lines used for assessment of copy number alteration detection

| Tumor cell line | Normal cell line | Percent tumor/normal | Total read pairs | Fraction uniquely aligned to hg19 | On-target unique read pairs | Median exon coverage | Fraction exons covered >= 100x | Sequence error rate |
|-----------------|------------------|----------------------|------------------|-----------------------------------|-----------------------------|----------------------|--------------------------------|---------------------|
| HCC1143         | HCC1143 BL       | 100% / 0%            | 29,836,251       | 92%                               | 11,329,859                  | 515                  | 99%                            | 0.28%               |
| HCC1143         | HCC1143 BL       | 80% / 20%            | 35,582,339       | 92%                               | 13,707,084                  | 596                  | 100%                           | 0.29%               |
| HCC1143         | HCC1143 BL       | 50% / 50%            | 30,391,462       | 92%                               | 12,082,932                  | 561                  | 100%                           | 0.32%               |
| HCC1143         | HCC1143 BL       | 40% / 60%            | 29,607,219       | 92%                               | 11,370,365                  | 532                  | 100%                           | 0.26%               |
| HCC1143         | HCC1143 BL       | 30% / 70%            | 43,592,209       | 92%                               | 16,551,377                  | 775                  | 100%                           | 0.29%               |
| HCC1143         | HCC1143 BL       | 20% / 80%            | 37,359,326       | 92%                               | 13,525,907                  | 637                  | 100%                           | 0.27%               |
| HCC2218         | HCC2218 BL       | 100% / 0%            | 22,605,297       | 92%                               | 7,125,071                   | 266                  | 97%                            | 0.29%               |
| HCC2218         | HCC2218 BL       | 80% / 20%            | 36,937,520       | 92%                               | 13,076,437                  | 592                  | 100%                           | 0.29%               |
| HCC2218         | HCC2218 BL       | 50% / 50%            | 33,793,687       | 92%                               | 11,673,760                  | 537                  | 100%                           | 0.36%               |
| HCC2218         | HCC2218 BL       | 40% / 60%            | 36,611,814       | 92%                               | 7,514,667                   | 280                  | 99%                            | 0.31%               |
| HCC2218         | HCC2218 BL       | 30% / 70%            | 43,637,833       | 92%                               | 13,828,282                  | 593                  | 100%                           | 0.28%               |
| HCC2218         | HCC2218 BL       | 20% / 80%            | 36,495,222       | 92%                               | 12,532,424                  | 593                  | 100%                           | 0.37%               |
| NCI-H1395       | NCI-BL1395       | 100% / 0%            | 29,065,742       | 92%                               | 10,700,333                  | 502                  | 100%                           | 0.37%               |
| NCI-H1395       | NCI-BL1395       | 80% / 20%            | 36,038,287       | 92%                               | 11,361,481                  | 525                  | 100%                           | 0.31%               |
| NCI-H1395       | NCI-BL1395       | 50% / 50%            | 33,366,113       | 92%                               | 12,138,176                  | 573                  | 100%                           | 0.32%               |
| NCI-H1395       | NCI-BL1395       | 40% / 60%            | 25,539,233       | 92%                               | 7,818,250                   | 329                  | 100%                           | 0.27%               |
| NCI-H1395       | NCI-BL1395       | 30% / 70%            | 40,361,718       | 92%                               | 7,346,586                   | 288                  | 99%                            | 0.30%               |
| NCI-H1395       | NCI-BL1395       | 20% / 80%            | 36,374,467       | 92%                               | 12,401,341                  | 600                  | 100%                           | 0.27%               |
| NCI-H1770       | NCI-BL1770       | 100% / 0%            | 46,569,279       | 92%                               | 16,853,355                  | 758                  | 100%                           | 0.27%               |
| NCI-H1770       | NCI-BL1770       | 80% / 20%            | 37,030,829       | 92%                               | 10,396,701                  | 416                  | 100%                           | 0.36%               |
| NCI-H1770       | NCI-BL1770       | 50% / 50%            | 31,830,465       | 92%                               | 11,862,333                  | 569                  | 100%                           | 0.29%               |
| NCI-H1770       | NCI-BL1770       | 40% / 60%            | 33,966,162       | 92%                               | 12,887,759                  | 615                  | 100%                           | 0.26%               |
| NCI-H1770       | NCI-BL1770       | 30% / 70%            | 30,690,667       | 92%                               | 11,192,910                  | 551                  | 100%                           | 0.28%               |
| NCI-H1770       | NCI-BL1770       | 20% / 80%            | 45,235,990       | 92%                               | 13,730,324                  | 555                  | 100%                           | 0.36%               |
| NCI-H2009       | NCI-BL2009       | 100% / 0%            | 35,758,125       | 92%                               | 13,784,120                  | 649                  | 100%                           | 0.28%               |
| NCI-H2009       | NCI-BL2009       | 80% / 20%            | 32,871,962       | 92%                               | 12,124,715                  | 571                  | 100%                           | 0.27%               |
| NCI-H2009       | NCI-BL2009       | 50% / 50%            | 36,068,520       | 92%                               | 12,877,298                  | 602                  | 100%                           | 0.29%               |
| NCI-H2009       | NCI-BL2009       | 40% / 60%            | 21,327,300       | 92%                               | 8,402,288                   | 406                  | 99%                            | 0.31%               |
| NCI-H2009       | NCI-BL2009       | 30% / 70%            | 33,856,799       | 92%                               | 12,479,365                  | 618                  | 100%                           | 0.27%               |
| NCI-H2009       | NCI-BL2009       | 20% / 80%            | 41,030,097       | 92%                               | 14,059,098                  | 677                  | 100%                           | 0.29%               |
| NCI-H2122       | NCI-BL2122       | 100% / 0%            | 50,870,155       | 92%                               | 19,240,735                  | 882                  | 99%                            | 0.33%               |
| NCI-H2122       | NCI-BL2122       | 80% / 20%            | 34,549,033       | 92%                               | 13,083,989                  | 555                  | 99%                            | 0.26%               |
| NCI-H2122       | NCI-BL2122       | 50% / 50%            | 30,676,188       | 91%                               | 11,712,539                  | 576                  | 99%                            | 0.25%               |
| NCI-H2122       | NCI-BL2122       | 40% / 60%            | 33,701,500       | 92%                               | 12,869,190                  | 615                  | 100%                           | 0.29%               |
| NCI-H2122       | NCI-BL2122       | 30% / 70%            | 37,369,863       | 92%                               | 13,740,965                  | 604                  | 99%                            | 0.27%               |
| NCI-H2122       | NCI-BL2122       | 20% / 80%            | 29,152,070       | 92%                               | 10,413,365                  | 454                  | 100%                           | 0.26%               |
| NCI-H2126       | NCI-BL2126       | 100% / 0%            | 27,692,780       | 92%                               | 9,882,180                   | 412                  | 99%                            | 0.29%               |
| NCI-H2126       | NCI-BL2126       | 80% / 20%            | 39,255,911       | 92%                               | 14,565,890                  | 690                  | 100%                           | 0.29%               |
| NCI-H2126       | NCI-BL2126       | 50% / 50%            | 27,808,638       | 92%                               | 10,810,327                  | 522                  | 100%                           | 0.27%               |
| NCI-H2126       | NCI-BL2126       | 40% / 60%            | 36,326,389       | 92%                               | 13,132,951                  | 652                  | 100%                           | 0.36%               |
| NCI-H2126       | NCI-BL2126       | 30% / 70%            | 38,957,179       | 92%                               | 14,683,179                  | 706                  | 100%                           | 0.28%               |
| NCI-H2126       | NCI-BL2126       | 20% / 80%            | 40,503,947       | 92%                               | 15,530,310                  | 771                  | 100%                           | 0.28%               |

Supplementary Table 9B notes:

Many tumor cell lines have homozygous chromosomal deletions, so some exons are not expected to be covered >100x in these samples.

**Supplementary Table 10A****Summary of copy number alteration detection performance (sensitivity)**

| CNA type                     | Tumor fraction = 20% |                 |       |                     | Tumor fraction $\geq$ 30% |                 |       |                     |
|------------------------------|----------------------|-----------------|-------|---------------------|---------------------------|-----------------|-------|---------------------|
|                              | Total CNAs           | False negatives | Mean  | Confidence interval | Total CNAs                | False negatives | Mean  | Confidence interval |
| Amplification<br>CN $\geq$ 8 | 14                   | 1               | 92.9% | 66.1 – 99.8%        | 56                        | 0               | 100%  | 93.6 – 100%         |
| Amplification<br>CN $\geq$ 6 | 19                   | 3               | 84.2% | 60.4 – 96.6%        | 76                        | 8               | 89.5% | 80.3 – 95.3%        |
| Deletion                     | 9                    | 1               | 88.9% | 51.8 – 99.7%        | 36                        | 1               | 97.2% | 85.5 – 99.9%        |

**Supplementary Table 10B****Summary of copy number alteration detection performance (specificity)**

| CNA type      | All positives | False positives | Positive predictive value |                     |
|---------------|---------------|-----------------|---------------------------|---------------------|
|               |               |                 | Mean                      | Confidence interval |
| Amplification | 84            | 0               | 100%                      | 95.7 – 100%         |
| Deletion      | 43            | 0               | 100%                      | 91.8 – 100%         |

Supplementary Table 10A-B notes:

CNA amplification calls were considered false positives if the copy level of that gene in the pure tumor cell line was estimated to be  $<5$  copies. Confidence intervals were calculated as the exact 95% binomial confidence interval.

**Supplementary Table 10C**

**Summary of copy number alteration detection performance (full sensitivity results)**

| Tumor cell line | Gene   | Copy number | Percent tumor cell line in pool |     |     |     |     |
|-----------------|--------|-------------|---------------------------------|-----|-----|-----|-----|
|                 |        |             | 75%                             | 50% | 40% | 30% | 20% |
| HCC1143         | CCND1  | 12          | X                               | X   | X   | X   | X   |
| HCC1143         | MYC    | 8           | X                               | X   | X   | X   | X   |
| HCC1143         | AKT1   | 11          | X                               | X   | X   | X   | X   |
| HCC1143         | FGF3   | 12          | X                               | X   | X   | X   | X   |
| HCC1143         | FGF4   | 12          | X                               | X   | X   | X   | X   |
| HCC1143         | FGF19  | 12          | X                               | X   | X   | X   | X   |
| HCC1143         | MDM2   | 9           | X                               | X   | X   | X   | O   |
| HCC1143         | SRC    | 7           | X                               | O   | O   | O   | X   |
| HCC1143         | PBRM1  | 0           | X                               | X   | O   | X   | O   |
| HCC2218         | ERBB2  | 9           | X                               | X   | X   | X   | X   |
| HCC2218         | CDH1   | 0           | X                               | X   | X   | X   | X   |
| NCI-H1395       | MCL1   | 10          | X                               | X   | X   | X   | X   |
| NCI-H1395       | MYC    | 10          | X                               | X   | X   | X   | X   |
| NCI-H1770       | MYCN   | 13          | X                               | X   | X   | X   | X   |
| NCI-H2009       | RB1    | 0           | X                               | X   | X   | X   | X   |
| NCI-H2009       | FGF10  | 8           | X                               | X   | X   | X   | X   |
| NCI-H2009       | FGF14  | 6           | O                               | O   | O   | X   | X   |
| NCI-H2009       | IRS2   | 6           | X                               | O   | O   | X   | X   |
| NCI-H2009       | RICTOR | 8           | X                               | X   | X   | X   | X   |
| NCI-H2122       | MYC    | 10          | X                               | X   | X   | X   | X   |
| NCI-H2122       | CDKN2A | 0           | X                               | X   | X   | X   | X   |
| NCI-H2122       | CDKN2B | 0           | X                               | X   | X   | X   | X   |
| NCI-H2122       | LRP1B  | 0           | X                               | X   | X   | X   | X   |
| NCI-H2126       | CDKN2A | 0           | X                               | X   | X   | X   | X   |
| NCI-H2126       | CDKN2B | 0           | X                               | X   | X   | X   | X   |
| NCI-H2126       | MCL1   | 6           | X                               | X   | X   | X   | O   |
| NCI-H2126       | RICTOR | 7           | X                               | X   | X   | X   | O   |
| NCI-H2126       | LRP1B  | 0           | X                               | X   | X   | X   | X   |

Supplementary Table 10C notes:

X = Detected, O = Not detected

**Supplementary Table 11A**  
**Summary of NGS/Sequenom discordances**

| <b>NGS + / Sequenom - discordances</b>                            |                |
|-------------------------------------------------------------------|----------------|
| <b>Probable discordance reason</b>                                | <b># calls</b> |
| Sensitivity / Tissue heterogeneity<br>(weak evidence by Sequenom) | 5              |
| Unresolved                                                        | 2              |
| Total                                                             | 7              |

| <b>NGS - / Sequenom + discordances</b>                       |                |
|--------------------------------------------------------------|----------------|
| <b>Probable discordance reason</b>                           | <b># calls</b> |
| Sequenom miscall                                             | 1              |
| NGS miscall                                                  | 1              |
| Sensitivity / Tissue heterogeneity<br>(weak evidence by NGS) | 1              |
| Unresolved                                                   | 1              |
| Total                                                        | 4              |

**Supplementary Table 11B**  
**Summary of sequencing metrics for short variant (Sequenom) concordance samples (n=118)**

| <b>Percentile</b> | <b>Total read pairs</b> | <b>Fraction uniquely aligned to hg19</b> | <b>On-target unique read pairs</b> | <b>Median exon coverage</b> | <b>Fraction exons covered &gt;= 100x</b> | <b>Sequence error rate</b> |
|-------------------|-------------------------|------------------------------------------|------------------------------------|-----------------------------|------------------------------------------|----------------------------|
| 5                 | 28,074,541              | 89%                                      | 4,756,532                          | 326                         | 90%                                      | 0.25%                      |
| 25                | 33,877,061              | 92%                                      | 8,298,227                          | 765                         | 93%                                      | 0.30%                      |
| 50 (median)       | 40,722,157              | 95%                                      | 10,178,557                         | 921                         | 95%                                      | 0.35%                      |
| 75                | 47,360,898              | 97%                                      | 15,441,199                         | 1,227                       | 97%                                      | 0.41%                      |
| 95                | 53,594,991              | 97%                                      | 18,497,822                         | 1,465                       | 100%                                     | 0.47%                      |



**Supplementary Table 12A**  
**Summary of concordance between NGS and FISH/IHC**

| Study | Tissue        | Gene tested  | Method           | Number of samples <sup>b</sup> | FISH/IHC positive samples | NGS positive samples | Discordant calls | NGS Accuracy vs. FISH/IHC <sup>i</sup> |
|-------|---------------|--------------|------------------|--------------------------------|---------------------------|----------------------|------------------|----------------------------------------|
| A     | Prostate      | AR - Amp.    | FISH             | 25                             | 5                         | 5                    | 0                | 100%                                   |
| A     | Prostate      | PTEN - Del.  | FISH             | 22                             | 6                         | 7                    | 1 <sup>f</sup>   | 95%                                    |
| B     | Breast        | HER2 - Amp.  | FISH             | 42                             | 6                         | 6 <sup>e</sup>       | 0                | 100%                                   |
| C     | Breast        | HER2 - Amp.  | FISH             | 30 <sup>c</sup>                | 14                        | 13                   | 1 <sup>g</sup>   | 97%                                    |
| D     | Head and Neck | CCND1 - Amp. | IHC <sup>a</sup> | 34                             | 8                         | 9                    | 1 <sup>h</sup>   | 97%                                    |
| D     | Head and Neck | PTEN - Del.  | IHC <sup>a</sup> | 32 <sup>d</sup>                | 3                         | 3                    | 0                | 100%                                   |

Supplementary Table 12A notes:

<sup>a</sup> Strong expression for amplification or loss of staining for homozygous deletion

<sup>b</sup> Number of samples with copy number calls by both NGS and FISH/IHC (purity cut-off >20% for NGS), all NGS calls made blinded to confirmation method data

<sup>c</sup> Excludes one case classified as intermediate (5 copies) by NGS

<sup>d</sup> Excludes two cases with PTEN mutation by NGS and loss of staining

<sup>e</sup> Excludes one case with amplification of HER2 exons 17-27 only

<sup>f</sup> FISH analysis repeated and NGS data re-examined – discordance confirmed

<sup>g</sup> No evidence of gain by NGS

<sup>h</sup> Intermediate FISH expression

<sup>i</sup>  $1 - (\text{number of discordant calls} / \text{number of samples})$

**Supplementary Table 12B**  
**Summary of sequencing metrics for CNA (FISH/IHC) concordance samples (n=131)**

| Percentile  | Total read pairs | Fraction uniquely aligned to hg19 | On-target unique read pairs | Median exon coverage | Fraction exons covered >= 100x | Sequence error rate |
|-------------|------------------|-----------------------------------|-----------------------------|----------------------|--------------------------------|---------------------|
| 5           | 27,052,257       | 93%                               | 2,395,330                   | 164                  | 84%                            | 0.26%               |
| 25          | 40,105,861       | 96%                               | 7,512,241                   | 571                  | 100%                           | 0.41%               |
| 50 (median) | 45,942,100       | 97%                               | 12,781,379                  | 969                  | 100%                           | 0.49%               |
| 75          | 49,895,221       | 97%                               | 15,992,746                  | 1,188                | 100%                           | 0.55%               |
| 95          | 58,774,526       | 98%                               | 19,927,762                  | 1,458                | 100%                           | 0.75%               |

**Supplementary Table 13**  
**Summary of specimens and alterations in reproducibility (precision) assessment**

| Short variants<br>(base substitutions and indels) |              |               | TEST REPLICATE |    |    |   |   |
|---------------------------------------------------|--------------|---------------|----------------|----|----|---|---|
|                                                   |              |               | 1A             | 1B | 1C | 2 | 3 |
| Gene                                              | Variant type |               |                |    |    |   |   |
| ATRX                                              | base sub.    | splice        | X              | X  | X  | X | X |
| CDKN2A                                            | base sub.    | nonsense      | X              | X  | X  | X | X |
| CDKN2A                                            | base sub.    | nonsense      | X              | X  | X  | X | X |
| FGFR1                                             | base sub.    | missense      | X              | X  | X  | X | X |
| MLL2                                              | indel        | frameshift    | X              | X  | X  | X | X |
| NOTCH1                                            | indel        | frameshift    | O              | O  | O  | O | X |
| NPM1                                              | indel        | frameshift    | X              | X  | X  | X | X |
| PIK3CA                                            | base sub.    | missense      | X              | X  | X  | X | X |
| TP53                                              | base sub.    | splice        | X              | X  | X  | X | X |
| TP53                                              | base sub.    | missense      | X              | X  | X  | X | X |
| TP53                                              | indel        | nonframeshift | X              | X  | X  | X | X |
| TP53                                              | base sub.    | missense      | X              | X  | X  | X | X |
| TP53                                              | base sub.    | nonsense      | X              | X  | X  | X | X |
| TP53                                              | indel        | frameshift    | X              | X  | X  | X | X |

| Copy number alterations |               |            | 1A | 1B | 1C | 2 | 3 |
|-------------------------|---------------|------------|----|----|----|---|---|
| Gene                    | CNA type      | Copy level |    |    |    |   |   |
| CCND1                   | amplification | 16         | X  | X  | X  | X | X |
| CCND1                   | amplification | 8          | X  | X  | X  | X | X |
| CCNE1                   | amplification | 16         | X  | X  | X  | X | X |
| EGFR                    | amplification | 12         | X  | X  | X  | X | X |
| ERBB2                   | amplification | 16         | X  | X  | X  | X | X |
| ERBB2                   | amplification | 16         | X  | X  | X  | X | X |
| FGF19                   | amplification | 16         | X  | X  | X  | X | X |
| FGF19                   | amplification | 8          | X  | X  | X  | X | X |
| FGF3                    | amplification | 16         | X  | X  | X  | X | X |
| FGF3                    | amplification | 8          | X  | X  | X  | X | X |
| FGF4                    | amplification | 16         | X  | X  | X  | X | X |
| FGF4                    | amplification | 8          | X  | X  | X  | X | X |
| FGFR1                   | amplification | 16         | X  | X  | X  | X | X |
| IGF1R                   | amplification | 8          | O  | X  | O  | O | O |
| MCL1                    | amplification | 8          | O  | X  | X  | O | X |
| RAF1                    | amplification | 16         | X  | X  | X  | X | X |
| ZNF703                  | amplification | 16         | X  | X  | X  | X | X |
| CDKN2A                  | deletion      | 0          | X  | X  | X  | X | X |
| CDKN2B                  | deletion      | 0          | X  | X  | X  | X | X |
| RB1                     | deletion      | 0          | X  | O  | X  | X | X |
| TP53                    | deletion      | 0          | X  | O  | X  | X | X |

Supplementary Table 13 notes:

X = Detected, O = Not detected. CNA calls judged equivocal on blinded model review were excluded, including all amplifications of copy number 6-7, as well as two amplifications at copy number 8 in replicate 1C. Overall concordance was calculated as the average of pair-wise replicate concordances. Pair-wise replicate concordance was calculated as  $(2 \times \text{\# of concordant alterations detected}) / (\text{\# of alterations detected in replicate 1} + \text{\# of alterations detected in replicate 2})$ .

**Supplementary Table 14**  
**Summary of sequencing metrics for clinical tumor samples (n=2,221)**

| Percentile  | Total read pairs | Fraction uniquely aligned to hg19 | On-target unique read pairs | Median exon coverage | Fraction exons covered $\geq 100x$ | Sequence error rate |
|-------------|------------------|-----------------------------------|-----------------------------|----------------------|------------------------------------|---------------------|
| 5           | 26,315,828       | 96%                               | 5,234,501                   | 358                  | 99%                                | 0.24%               |
| 25          | 39,920,154       | 97%                               | 11,567,899                  | 885                  | 100%                               | 0.29%               |
| 50 (median) | 46,064,967       | 97%                               | 15,169,372                  | 1,189                | 100%                               | 0.34%               |
| 75          | 53,252,037       | 97%                               | 18,075,165                  | 1,409                | 100%                               | 0.41%               |
| 95          | 65,478,936       | 98%                               | 22,085,190                  | 1,728                | 100%                               | 0.56%               |

**Supplementary Table 15**  
**Alteration details for Figure 6B**

Available in online materials
